# Supplementary material for: Carbon dioxide gas accelerates solventless synthesis
Source: Royal Society of Chemistry journal article supplement (doi:10.1039/a909703a), 2000-01-01
Supplement: a909703a.doc [file a909703a.doc]

**Supplementary Information**

**Experimental Section**

**The hydrogenation of vinylnaphthalene** was performed by mixing solid chlorotris(triphenylphosphine)rhodium catalyst (7.0 mg, 7.6 mol) with solid 2-vinylnaphthalene (350 mg, 2.27 mmol, substrate:Rh = 300:1), both fine powders. The mixture was placed, with a stir bar, into a 22 mm diameter flat-bottomed glass liner in a 160 mL high pressure vessel, which was then sealed and warmed to 33 ˚C in a water bath. The vessel was flushed and pressurised with H2 to 10 bar. This was considered the start of the reaction. Carbon dioxide was then added to a total pressure of 67 bar. After 30 minutes, the vessel was removed from the water bath and vented. The product mixture was dissolved in CDCl3 and characterised by 1H NMR spectroscopy. For all experiments in this study, glass spacers were used to keep the glass liner upright and centred in the vessel. The ability of the stir bar inside the liner inside the vessel to couple to the custom-made magnetic stirrer below the vessel was confirmed in repeated testing.

**The hydrogenation of oleic acid** was performed by placing Pt/C (13.8 mg, 5 wt % Pt, 3.5 µmol of Pt), liquid oleic acid (100 mg, 0.35 mmol) and a micro stir bar in a 12 mm i.d. glass liner inside a stainless steel vessel under a dry and inert atmosphere. The vessel was heated to the desired reaction temperature by placement in a water bath and then filled with H2 (10 bar). This was considered the start of the reaction. Carbon dioxide was immediately afterwards added to a total pressure of 70 bar. After the desired reaction time, the vessel was removed from the water bath and vented. No spillover of the reaction mixture from the vial to the rest of the vessel interior was observed. The product mixture was dissolved in CDCl3 and characterised by 1H NMR spectroscopy.

**The hydroformylation of vinylnaphthalene** was performed by placing RhH(CO)(PPh3)3 (12 mg, 13 mol) and 2-vinylnaphthalene (400 mg, 2.6 mmol, substrate:Rh = 200:1), both powders, and a 14 mm stir bar into a 22 mm i.d. glass liner under a dry and inert atmosphere. The glass liner was then placed in a 160 mL high pressure vessel which was then sealed and warmed to the reaction temperature in a water bath. The vessel was flushed and pressurised with 1:1 CO:H2 mix to 20 bar. This was considered the start of the reaction. Carbon dioxide was immediately afterwards added to a total pressure of 75 bar. After the desired reaction time, the vessel was removed from the water bath and vented. No spillover of the reaction mixture from the vial to the rest of the vessel interior was observed. The product mixture was dissolved in CDCl3 and characterised by 1H NMR spectroscopy.
